# Supplementary material for: Continuous-inline extraction of polar co-solvent during sequential flow reactions
Source: Royal Society of Chemistry journal article supplement (doi:10.1039/d4re00276h), 2024-01-01

## Supporting Information

### Continuous-Inline Extraction of Polar Co-solvent During Sequential Flow Reactions

Kwihwan Kobayashi,\*<sup>a</sup> Jun Matsuzawa,<sup>a</sup> Hajime Kawanami,<sup>a</sup> and Nagatoshi Koumura\*<sup>a</sup>

a. Interdisciplinary Research Center for Catalytic Chemistry, National Institute of Advanced Industrial Science and Technology Central 5, Higashi 1-1-1, Tsukuba, Ibaraki 305-8565, Japan. E-mail: kobayashi-kwihwan@aist.go.jp, n-koumura@aist.go.jp

#### Contents

1. General
2. Procedures for preparation of catalysts
3. Procedures for the 1,4-conjugate addition under batch conditions (Table 1)
4. Experimental setup for flow reactions
5. Optimization for the flow aldol condensation
6. Optimization for the flow 1,4-conjugate addition
7. Procedure and calculation for the void volume of the catalyst column
8. Reaction pressure profiles for the scale-up experiments (Figure 2)
9. <sup>1</sup>H and <sup>13</sup>C NMR spectra
10. GC charts

#### 1. General

Gas chromatography was measured on a Shimadzu GC-2014 spectrometer with N<sub>2</sub> gas as a carrier, using Agilent Technologies DB-1 column (Length: 30 m, I.D.: 0.250 mm, Film: 0.25 μm). A dual plunger pump (UI-22 series) was purchased from FLOM, Inc., and flow reactor (XCR-1000, HCR-1000), column (CLM-1010) and fraction collector (DC-1000) were purchased from EYELA. Mixer-setters (MSL-IT-04-00-00, MSL-IT-02-00-00) was purchased from MAK ENGINEERING Co. Ltd. Other chemicals and solvents were purchased from Tokyo Chemical Industry Co., Ltd, FUJIFILM Wako pure chemicals, Kishida chemical Co., Ltd., and Sigma-Aldrich.

#### 2. Procedures for preparation of catalysts

##### Amberlyst A26 (Sigma-Aldrich)

Amberlyst A26 (10 g) was added into H<sub>2</sub>O (20 mL), stirred for 30 min, and filtrated with H<sub>2</sub>O (20 mL × 3). Obtained catalysts was added into EtOH (20 mL), stirred for 30 min, and filtrated with EtOH (20 mL × 3). Furthermore, obtained catalysts was added into toluene/EtOH (9/1, 20 mL), stirred for 30 min, and filtrated with toluene/EtOH (9/1, 20 mL × 3).

##### Amberlyst A21 (Sigma-Aldrich)

Amberlyst A21 (10 g) was added into 5%NaOH aq. (100 mL) and stirred for 16 hours. The supernatant was removed,

and new H<sub>2</sub>O (100 mL) was added. After stirring for 10 min, the supernatant was removed, and new H<sub>2</sub>O (100 mL) was added. Obtained catalysts was filtrated with H<sub>2</sub>O (50 mL) and added in EtOH (100 mL). Obtained catalysts was filtrated with EtOH (50 mL) and added in toluene (100 mL). Obtained catalysts was filtrated with toluene (50 mL).

### 3. Procedures for the 1,4-conjugate addition under batch conditions (Table 1)

A reaction mixture of chalcone (**3**; 1.0 mmol, 208.3 mg), diethyl malonate (**4**; 1.05 mmol, 168.2 mg), and Amberlyst A21 (100 wt%, 208.3 mg) in toluene (5 mL) was heated at 60 °C and stirred for 24 hours. The reaction mixture was cooled to room temperature and filtered through a filter with ethyl acetate. Obtained filtrates were analyzed by GC to determine yield of **5**.

### 4. Experimental setup for flow reactions

#### Reaction apparatus

| pump                                                                                | column reactor                                                                      | column                                                                                |
|-------------------------------------------------------------------------------------|-------------------------------------------------------------------------------------|---------------------------------------------------------------------------------------|
|   |   |   |
| UI-22 110P, EYELA                                                                   | XCR-1000, EYELA                                                                     | CLM-1010, EYELA<br>ID: 10 mm, L: 100 mm                                               |
| Fraction collector                                                                  | Mixer-settler                                                                       | column reactor                                                                        |
|  |  |  |
| DC-1000, EYELA                                                                      | MSL-IT-04-00-00 (setter volume: 11.2 mL), MAK ENGINEERING Co. Ltd.                  | HCR-1000, EYELA                                                                       |
| column                                                                              | Mixer-settler                                                                       |                                                                                       |

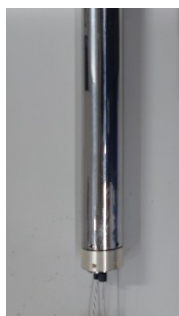

column for HCR-1000, EYELA  
ID: 37 mm, L: 300 mm

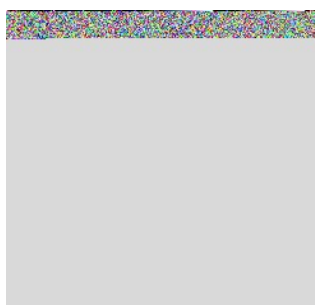

MSL-IT-02-00-00 (setter volume:  
28 mL), MAK ENGINEERING Co.  
Ltd.

### Flow aldol condensation

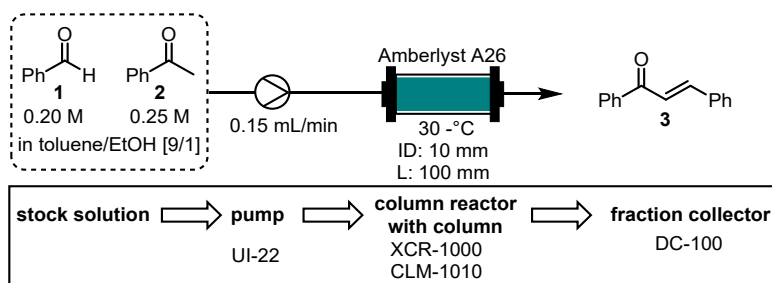

Amberlyst A26 (5.0 g) was packed into a column (I.D. 10×100 mm, CLM-1010, EYELA). The catalyst column was set onto the reactor, and toluene/EtOH [9/1] was flowed at 0.15 mL/min (pump: UI-22 110P, EYELA) for 30 min to remove residual air inside. The catalyst column was heated at 30 °C (heating controller and column reactor: XCR-1000, EYELA) with solvent flow, after stabilization the reaction was started by changing into stock solution of benzaldehyde (1; 0.20 M) and acetophenone (2, 0.25 M) in toluene/EtOH [9/1]. The resulted solution was fractionated for every 1 hours (9 mL) (Fraction collector: DC-1000, EYELA), and selected fractions were analyzed GC to determine yields.

### Flow 1,4-conjugate addition (Figure 1a)

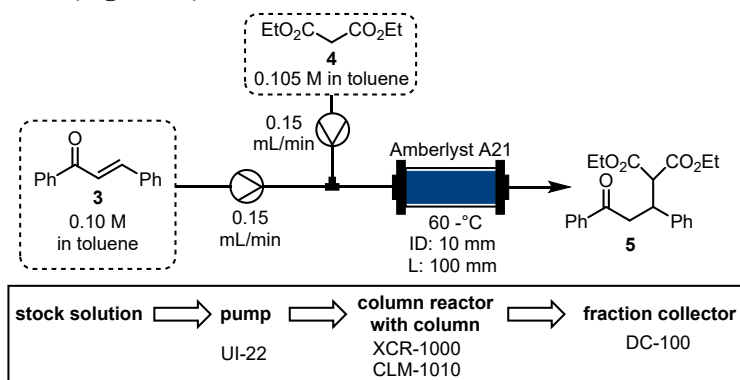

Amberlyst A21 (4.6 g) was packed into a column (I.D. 10×100 mm, CLM-1010, EYELA). The catalyst column was set onto the reactor, and toluene was flowed at 0.15 mL/min (pump: UI-22 110P, EYELA) by two pumps for 30 min to remove residual air inside. The catalyst column was heated at 60 °C (heating controller and column reactor: XCR-

1000, EYELA) with solvent flow, after stabilization the reaction was started by changing into stock solution of chalcone (**3**; 0.10 M) in toluene and stock solution of diethyl malonate (**4**, 0.105 M) in toluene. The resulted solution was fractionated for every 30 min (9 mL) (Fraction collector: DC-1000, EYELA), and selected fractions were analyzed GC to determine yields.

### Sequential flow reaction of aldol condensation and 1,4-conjugate addition

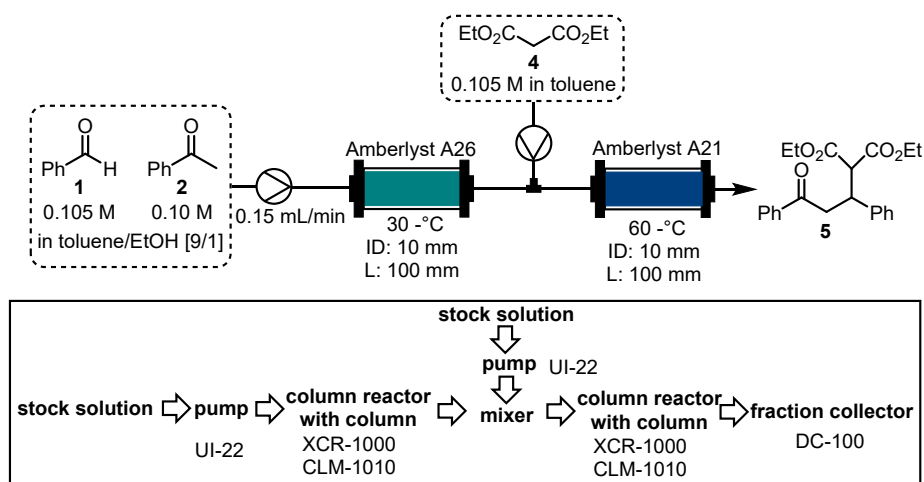

Amberlyst A26 (5.0 g) was packed into a first column (I.D. 10×100 mm, CLM-1010, EYELA). Amberlyst A21 (4.6 g) was packed into a second column (I.D. 10×100 mm, CLM-1010, EYELA). The catalyst columns were set onto the reactors. Toluene/EtOH [9/1] was flowed at 0.15 mL/min (pump: UI-22 110P, EYELA) for the first column, and toluene was flowed at 0.15 mL/min (pump: UI-22 110P, EYELA) for the second column for 30 min to remove residual air inside. The first and second columns were respectively heated at 30 °C and 60 °C (heating controller and column reactor: XCR-1000, EYELA) with solvent flow, and after stabilization the first reaction was started by changing into stock solution of benzaldehyde (**1**; 0.105 M) and acetophenone (**2**, 0.10 M) in toluene/EtOH [9/1]. After 1 hours later, the second reaction was started by changing into stock solution of stock solution of diethyl malonate (**4**, 0.105 M) in toluene. The resulted solution was fractionated for every 30 min (9 mL) (Fraction collector: DC-1000, EYELA), and selected fractions were analyzed GC to determine yields.

### Continuous-extraction and 1,4-conjugate addition (Table 2)

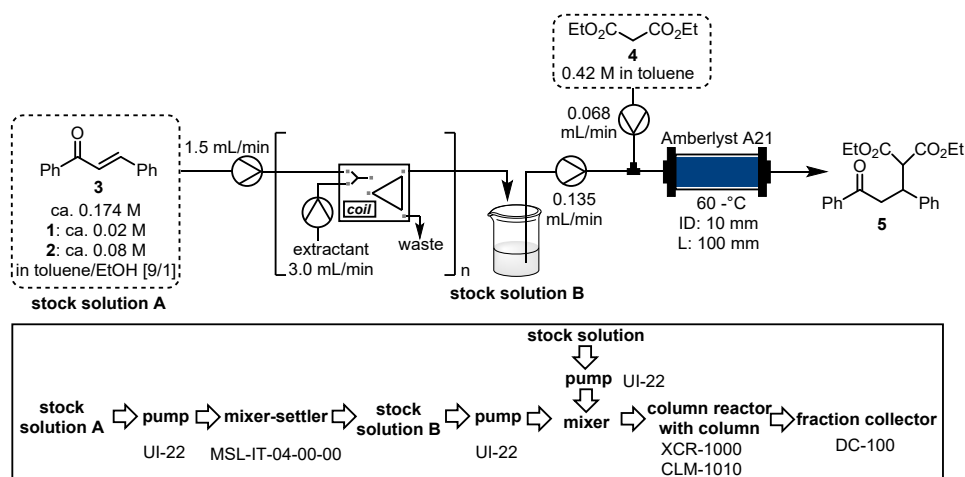

Stock solution A was prepared by the procedure of **Flow aldol condensation**. Stock solution A was flowed at 1.5 mL/min (pump: UI-22 110P, EYELA) to a mixer-settler (MSL-IT-04-00-00, MAK ENGINEERING Co. Ltd.) with extractant at 3.0 mL/min to store a stock solution B. Stock solution B was analyzed GC to determine extraction rate of EtOH, extraction rate of **1**, and survival rate of **3**. Amberlyst A21 (4.6 g) was packed into a column (I.D. 10×100 mm, CLM-1010, EYELA). The catalyst column was set onto the reactor, and toluene was flowed at 0.135 mL/min and 0.068 mL/min (pump: UI-22 110P, EYELA) by two pumps for 30 min to remove residual air inside. The catalyst column was heated at 60 °C (heating controller and column reactor: XCR-1000, EYELA) with solvent flow, after stabilization the reaction was started by changing into the stock solution B and a stock solution of diethyl malonate (**4**, 0.105 M) in toluene. The resulted solution was fractionated for every 1 hours (12 mL) (Fraction collector: DC-1000, EYELA), and selected fractions were analyzed GC to determine yields.

### Flow aldol condensation, continuous-extraction, and 1,4-conjugate addition (Table 3)

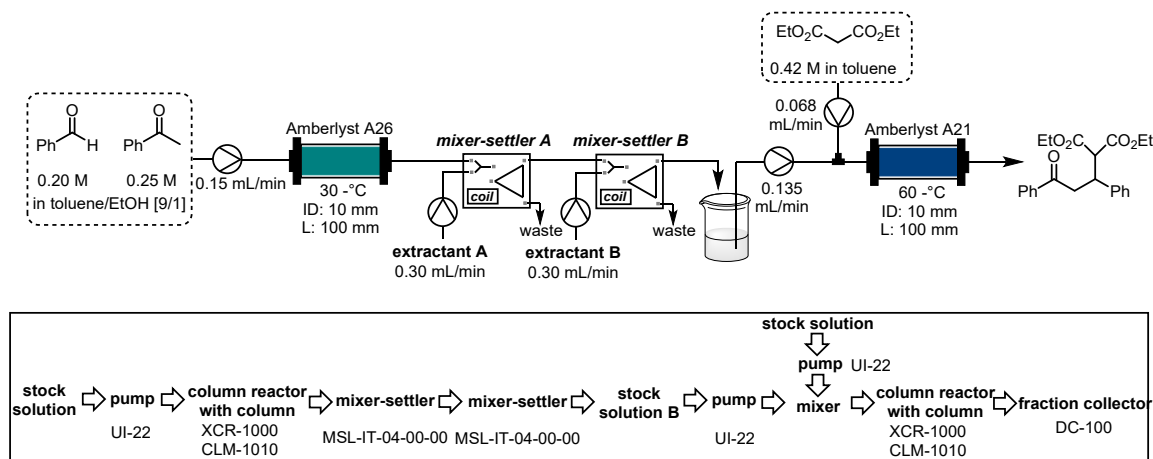

Amberlyst A26 (5.0 g) was packed into a column (I.D. 10×100 mm, CLM-1010, EYELA). The catalyst column was set onto the reactor, and toluene/EtOH [9/1] was flowed at 0.15 mL/min (pump: UI-22 110P, EYELA) for 30 min to remove residual air inside. The catalyst column was heated at 30 °C (heating controller and column reactor: XCR-1000, EYELA) with solvent flow, after stabilization the reaction was started by changing into stock solution of benzaldehyde (**1**; 0.20 M) and acetophenone (**2**, 0.25 M) in toluene/EtOH [9/1]. A solution of aldol condensation was flowed at 0.15 mL/min (pump: UI-22 110P, EYELA) to a mixer-settler A (MSL-IT-04-00-00, MAK ENGINEERING

Co. Ltd.) with extractant at 0.3 mL/min. Organic phase was sent to a mixer-setter B with extractant at 0.3 mL/min to store a stock solution B. Stock solution B was analyzed GC to determine extraction rate of EtOH, extraction rate of **1**, and survival rate of **3**. Amberlyst A21 (4.6 g) was packed into a column (I.D. 10×100 mm, CLM-1010, EYELA). The catalyst column was set onto the reactor, and toluene was flowed at 0.135 mL/min and 0.068 mL/min (pump: UI-22 110P, EYELA) by two pumps for 30 min to remove residual air inside. The catalyst column was heated at 60 °C (heating controller and column reactor: XCR-1000, EYELA) with solvent flow, after stabilization the reaction was started by changing into the stock solution B and a stock solution of diethyl malonate (**4**, 0.105 M) in toluene. The resulted solution was fractionated for every 1 hours (12 mL) (Fraction collector: DC-1000, EYELA), and selected fractions were analyzed GC to determine yields.

### Scale-up experiment for the sequential flow reaction

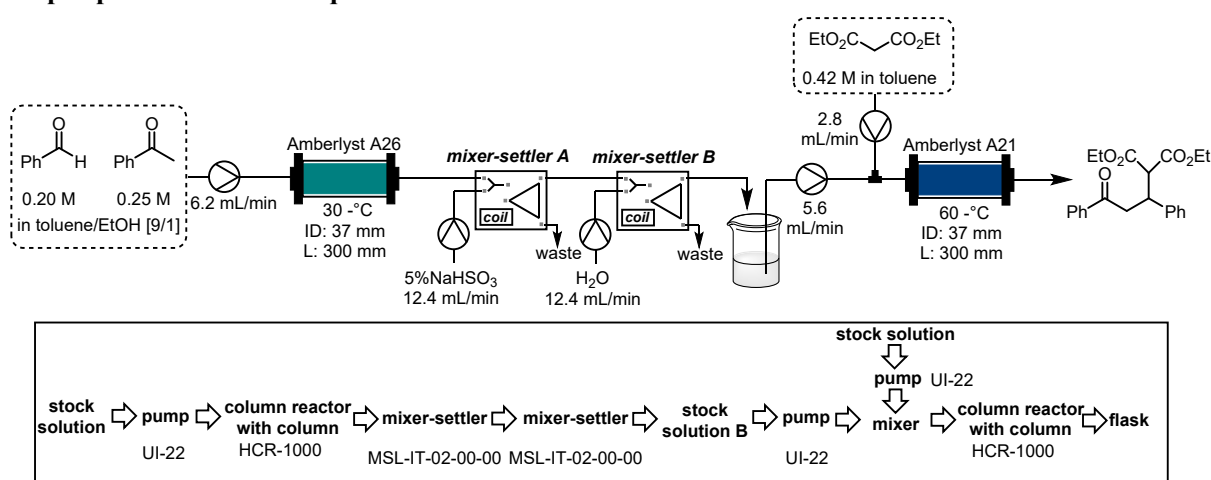

Amberlyst A26 (186.5 g) was packed into a column (I.D. 37×300 mm, HCR-1000, EYELA). The catalyst column was set onto the reactor, and toluene/EtOH [9/1] was flowed at 6.2 mL/min (pump: UI-22 110P, EYELA) for 30 min to remove residual air inside. The catalyst column was heated at 30 °C (heating controller and column reactor: HCR-1000, EYELA) with solvent flow, after stabilization the reaction was started by changing into stock solution of benzaldehyde (**1**; 0.20 M) and acetophenone (**2**, 0.25 M) in toluene/EtOH [9/1]. A solution of aldol condensation was flowed at 6.2 mL/min (pump: UI-22 110P, EYELA) to a mixer-setter A (MSL-IT-02-00-00, MAK ENGINEERING Co. Ltd.) with extractant at 12.4 mL/min. Organic phase was sent to a mixer-setter B with extractant at 12.4 mL/min to store a stock solution B. Stock solution B was analyzed GC to determine extraction rate of EtOH, extraction rate of **1**, and survival rate of **3**. Amberlyst A21 (185.0 g) was packed into a column (I.D. 37×300 mm, HCR-1000, EYELA). The catalyst column was set onto the reactor, and toluene was flowed at 5.6 mL/min and 2.8 mL/min (pump: UI-22 110P, EYELA) by two pumps for 30 min to remove residual air inside. The catalyst column was heated at 60 °C (heating controller and column reactor: HCR-1000, EYELA) with solvent flow, after stabilization the reaction was started by changing into the stock solution B and a stock solution of diethyl malonate (**4**, 0.105 M) in toluene. The resulted solution was stored to the plastic container and taken samples to to determine yields by GC.

### Continuous-extraction for various co-solvent with toluene

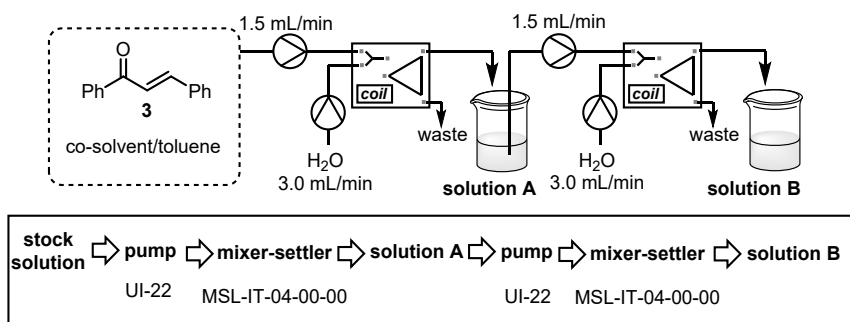

Solution of **3** (0.2 M) in co-solvent/toluene was flowed at 1.5 mL/min (pump: UI-22 110P, EYELA) to a mixer-settler (MSL-IT-04-00-00, MAK ENGINEERING Co. Ltd.) with H<sub>2</sub>O at 3.0 mL/min to store a solution A. Solution A was analyzed GC to determine extraction rate of EtOH and survival rate of **3**. Solution A was flowed at 1.5 mL/min (pump: UI-22 110P, EYELA) to a mixer-settler (MSL-IT-04-00-00, MAK ENGINEERING Co. Ltd.) with H<sub>2</sub>O at 3.0 mL/min to store a solution B. Solution B was analyzed GC to determine extraction rate of EtOH and survival rate of **3**.

### 5. Optimization for the flow aldol condensation

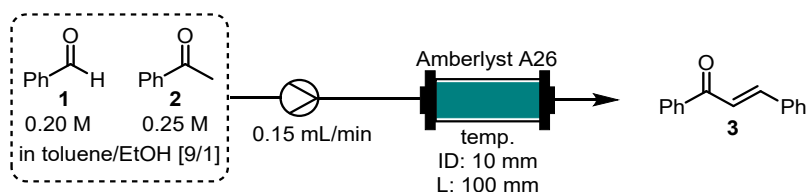

According to procedure of **Flow aldol condensation**.

| entry | temp. (°C) | yield (%) |
|-------|------------|-----------|
| 1     | 30         | 86        |
| 2     | 40         | 79        |
| 3     | 50         | 68        |
| 4     | 60         | 52        |

### 6. Optimization for the flow 1,4-conjugate addition

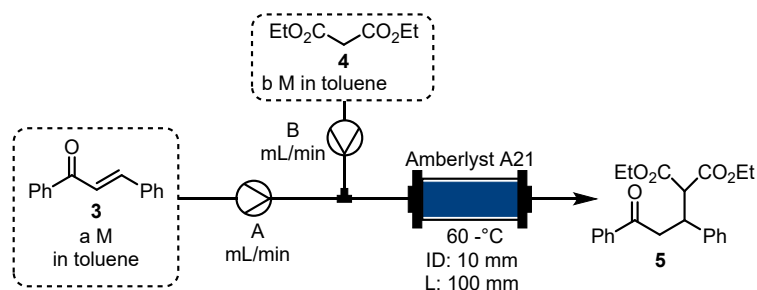

According to procedure of **Flow 1,4-conjugate addition**.

| entry | a (M) | b (M) | A (mL/min) | B (mL/min) | yield (%) |
|-------|-------|-------|------------|------------|-----------|
| 1     | 0.20  | 0.21  | 0.27       | 0.27       | 59        |
| 2     | 0.20  | 0.21  | 0.135      | 0.135      | 65        |

|   |      |      |       |       |    |
|---|------|------|-------|-------|----|
| 3 | 0.20 | 0.21 | 0.068 | 0.068 | 78 |
| 4 | 0.20 | 0.42 | 0.135 | 0.068 | 74 |

### 7. Procedure and calculation for the void volume of the catalyst column

A catalyst was packed into a column. The catalyst column was sealed with plugs and weighted. Sealed plugs were removed, and the catalyst column was set onto a flow reactor. The catalyst column was filled with toluene by a pump. After solvent filling, the catalyst column was sealed with plugs and weighted. The void volume of catalyst column was calculated as follows with the density of toluene (0.867 g/mL).

| catalyst      | column size          | void volume (mL) | total flow rate (mL/min) | residence time (min) |
|---------------|----------------------|------------------|--------------------------|----------------------|
| Amberlyst A26 | ID: 10 mm, L: 100 mm | 2.13             | 0.15                     | 14.2                 |
| Amberlyst A26 | ID: 37 mm, L: 300 mm | 85.2             | 6.2                      | 13.7                 |
| Amberlyst A21 | ID: 10 mm, L: 100 mm | 2.78             | 0.30                     | 9.3                  |
| Amberlyst A21 | ID: 10 mm, L: 100 mm | 2.78             | 0.203                    | 13.7                 |
| Amberlyst A21 | ID: 37 mm, L: 300 mm | 111.2            | 8.4                      | 13.2                 |



## 8. Reaction pressure profiles for the scale-up experiments (Figure 2)

### Flow aldol condensation

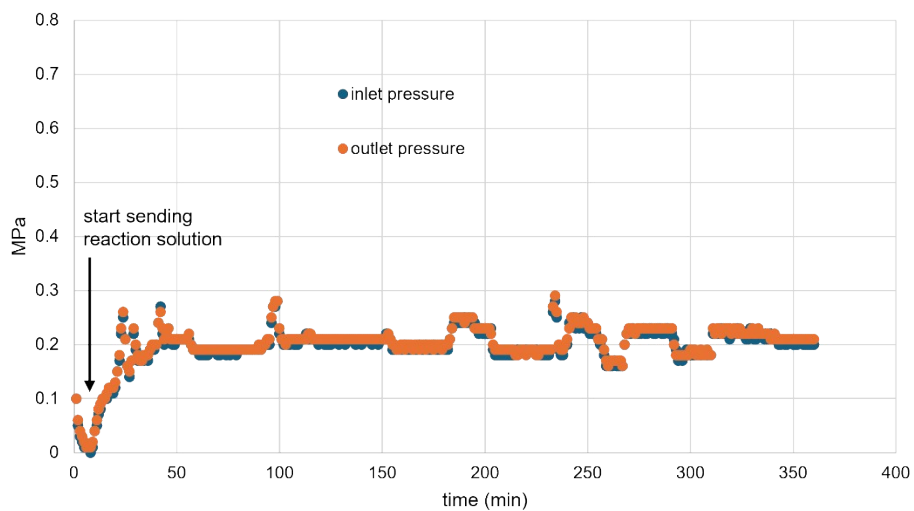

### Flow 1,4-conjugate addition

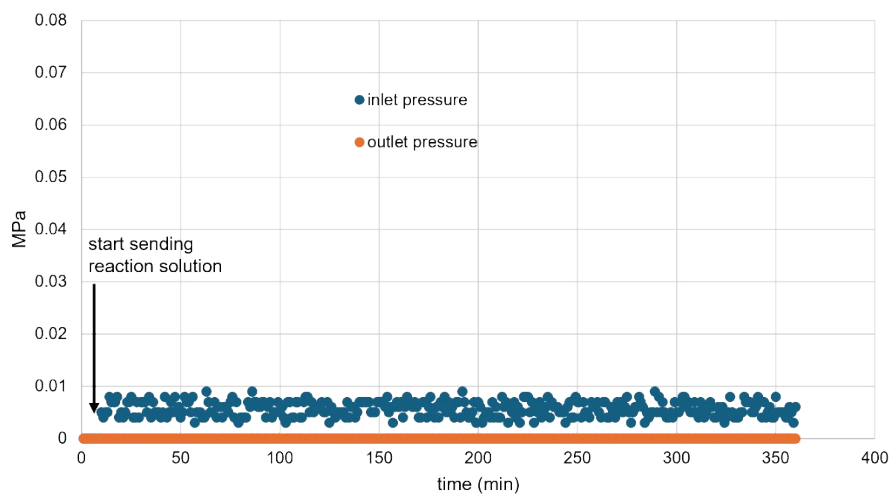

## 9. <sup>1</sup>H and <sup>13</sup>C NMR spectra

### Diethyl 2-(3-oxo-1, 3-diphenylpropyl)malonate (5)

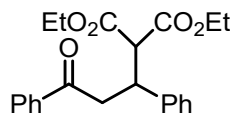

<sup>1</sup>H NMR (400 MHz, CDCl<sub>3</sub>): δ 7.88 (d, *J* = 7.2 Hz, 2H), 7.48 (dd, *J* = 7.6, 7.6 Hz, 1H), 7.37 (dd, *J* = 7.6, 7.6 Hz, 2H), 7.27 (d, *J* = 7.2 Hz, 2H), 7.21 (dd, *J* = 7.6, 7.6 Hz, 2H), 7.14 (dd, *J* = 7.2 Hz, 1H), 4.23–4.13 (m, 3H), 3.93 (q, *J* = 7.2 Hz, 2H), 3.85 (d, *J* = 9.6 Hz, 1H), 3.58–3.43 (m, 2H), 1.21 (t, *J* = 7.2 Hz, 3H), 0.98 (t, *J* = 7.2 Hz, 3H); <sup>13</sup>C NMR (100 MHz, CDCl<sub>3</sub>): δ 197.5, 168.3, 167.7, 140.6, 136.8, 133.0, 128.5, 128.3, 128.0, 127.1, 61.6, 61.2, 57.5, 42.6, 40.9, 14.0, 13.7. Spectroscopic data of <sup>1</sup>H and <sup>13</sup>C NMR were identical to *Org. Biomol. Chem.* **2014**, *12*, 3166.

<sup>1</sup>H NMR of **5** (CDCl<sub>3</sub>, 400 Hz)

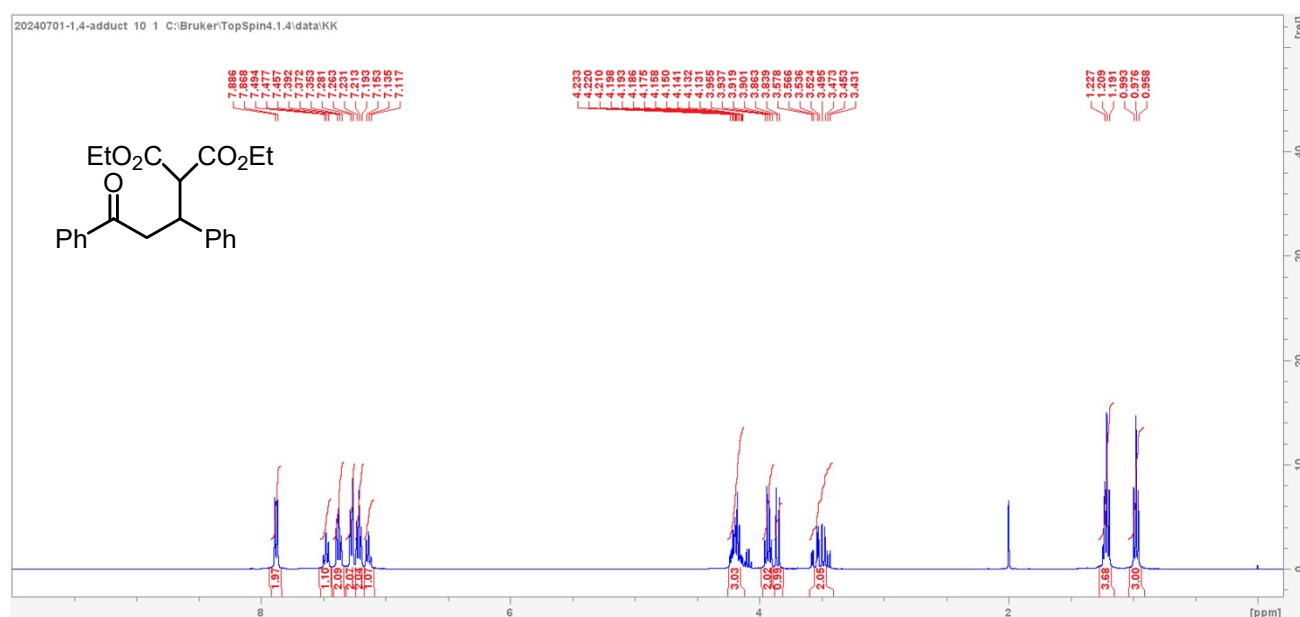

<sup>13</sup>C NMR of **5** (CDCl<sub>3</sub>, 100 Hz)

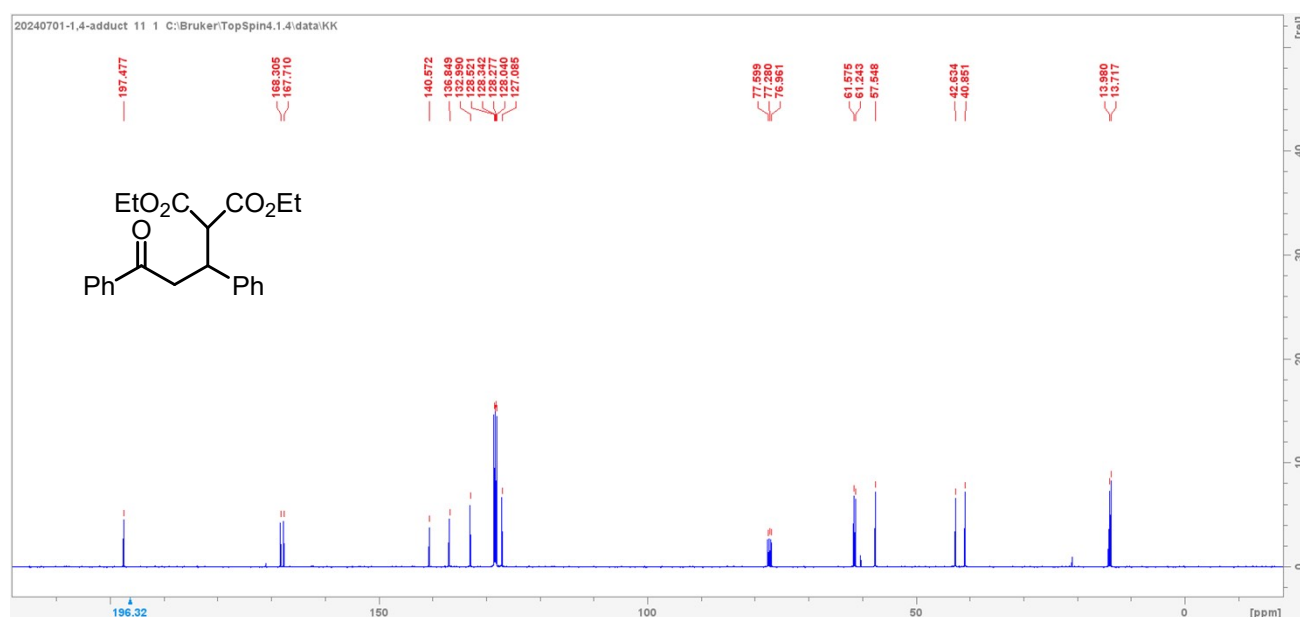

## 10. GC charts for continuous extraction (Table 4)

### Aldol condensation (Table 3)

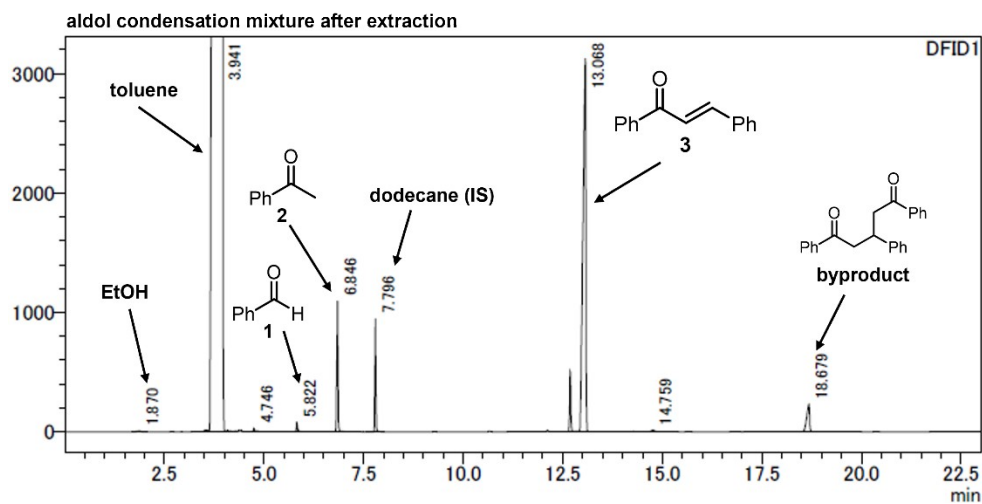

### Diethyl 2-(3-oxo-1,3-diphenylpropyl)malonate (5)

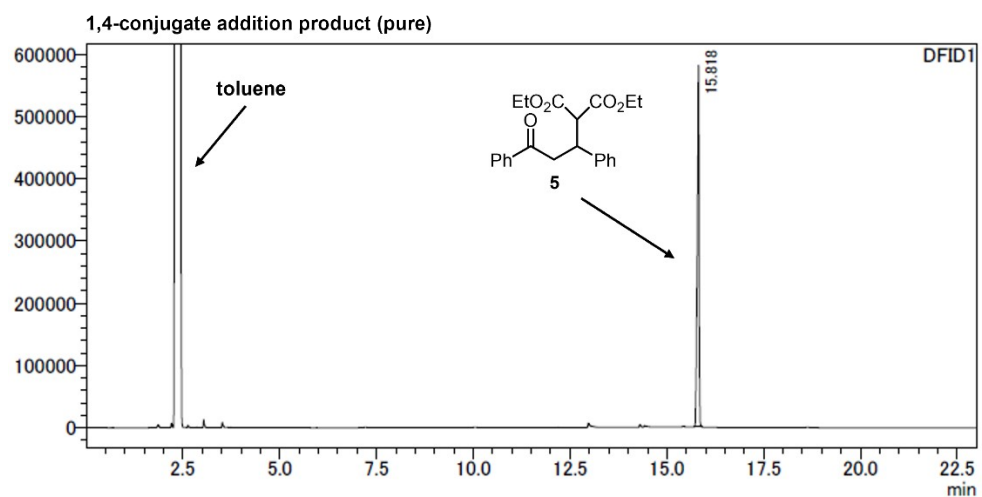

### 1,4-Conjugate addition (Table 3, entry 4)

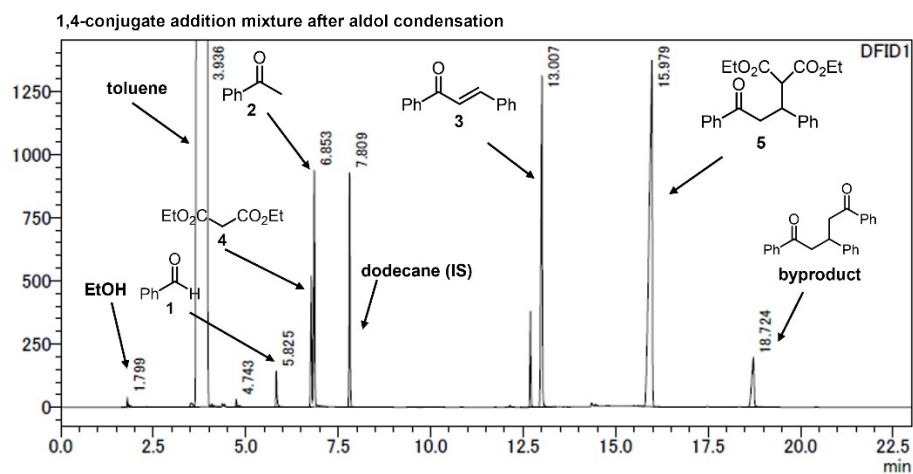

### 10% EtOH (Table 4, entry 1)

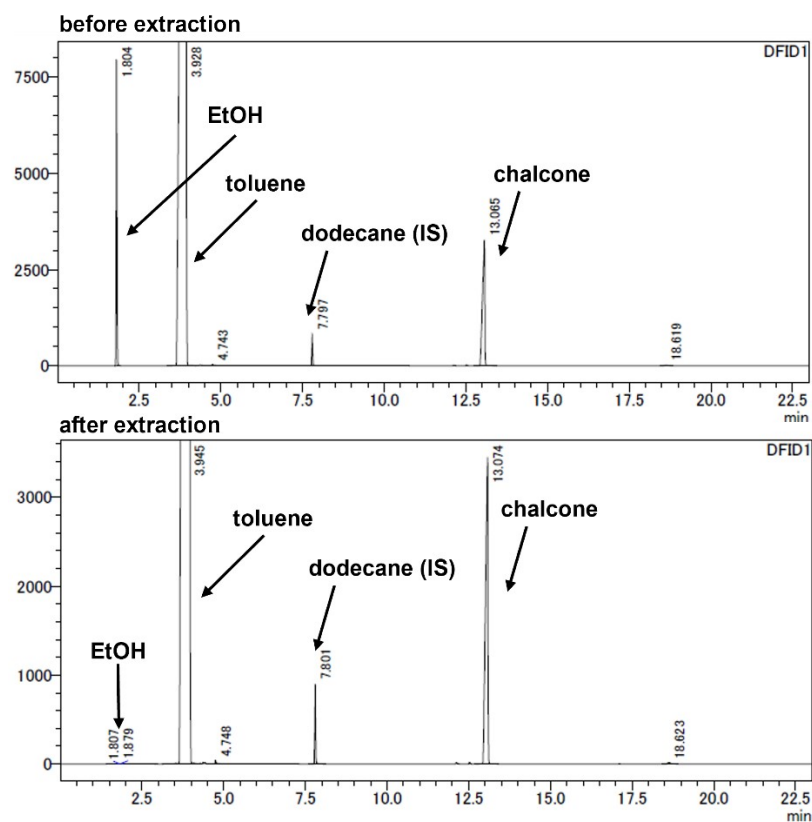

### 20%EtOH (Table 4, entry 2)

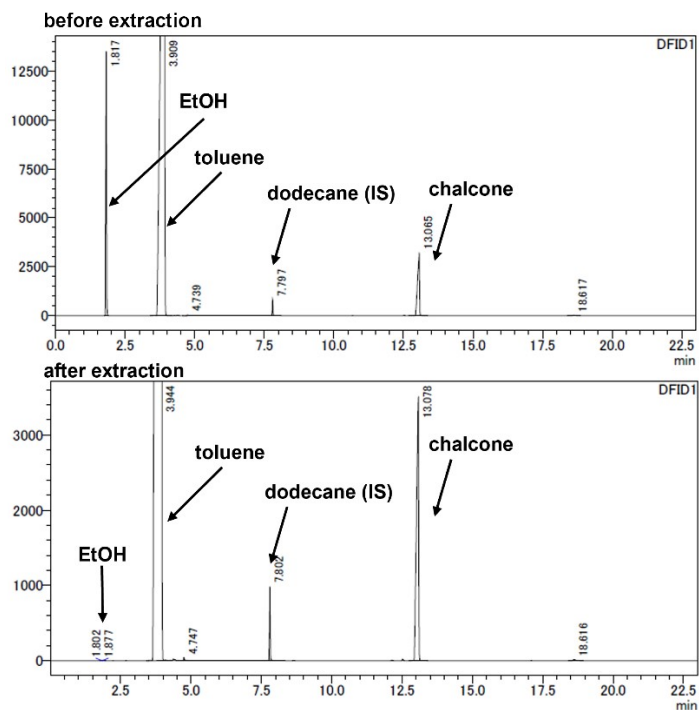

### 30%EtOH (Table 4, entry 3)

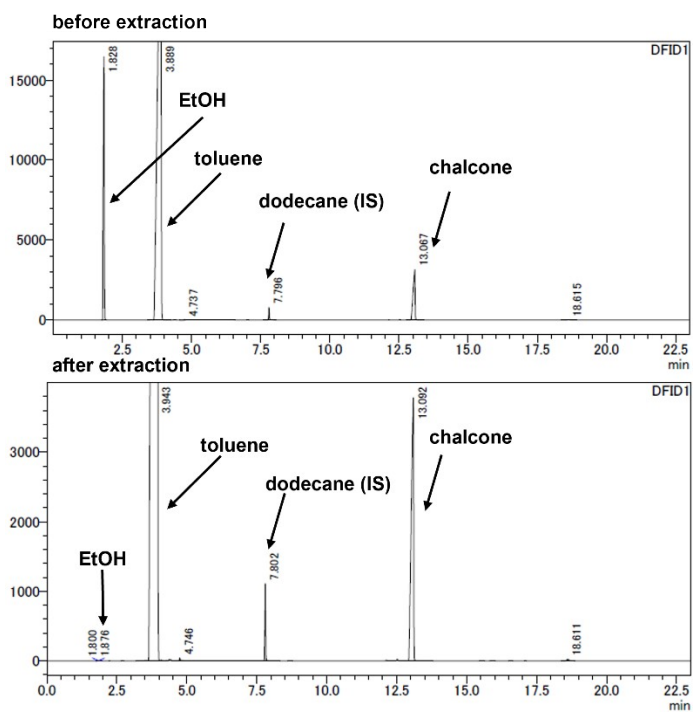

### 40%EtOH (Table 4, entry 4)

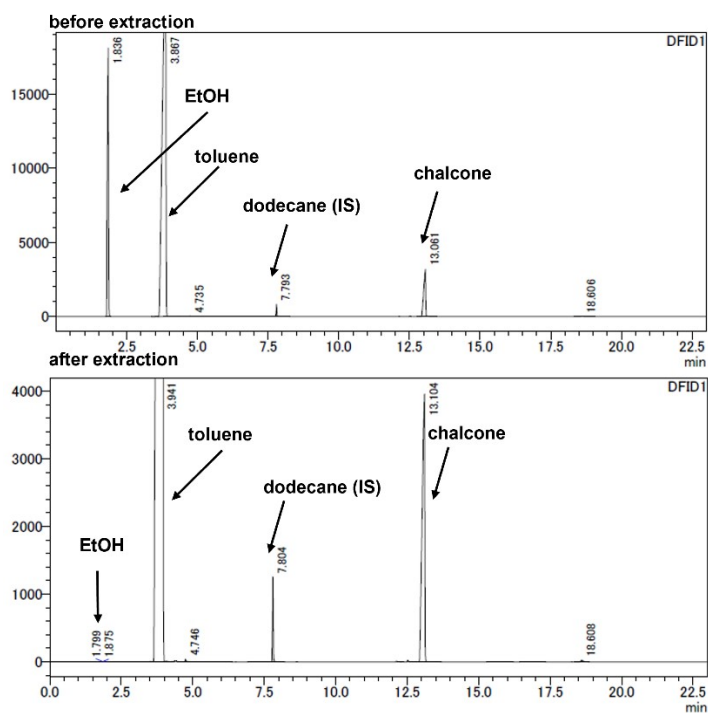

### 10%MeOH (Table 4, entry 5)

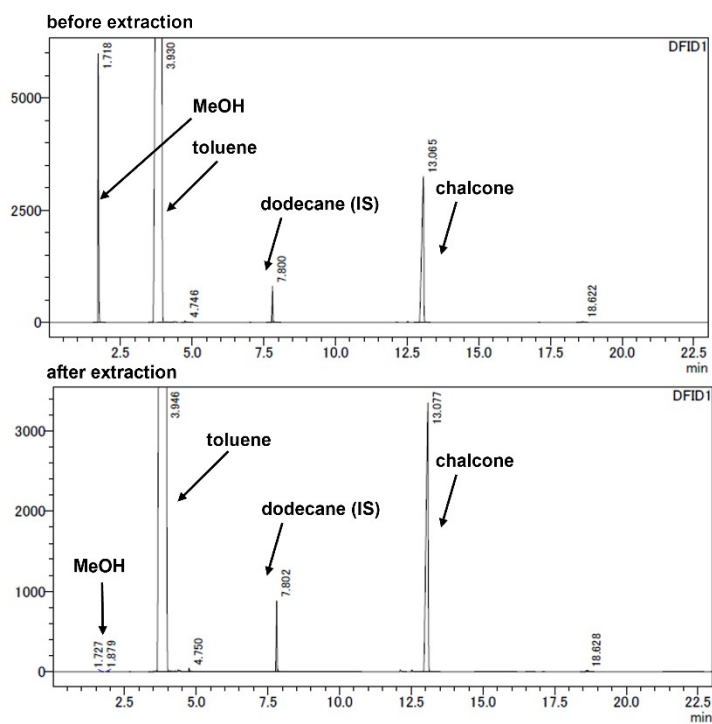

### 10%2-PrOH (Table 4, entry 6)

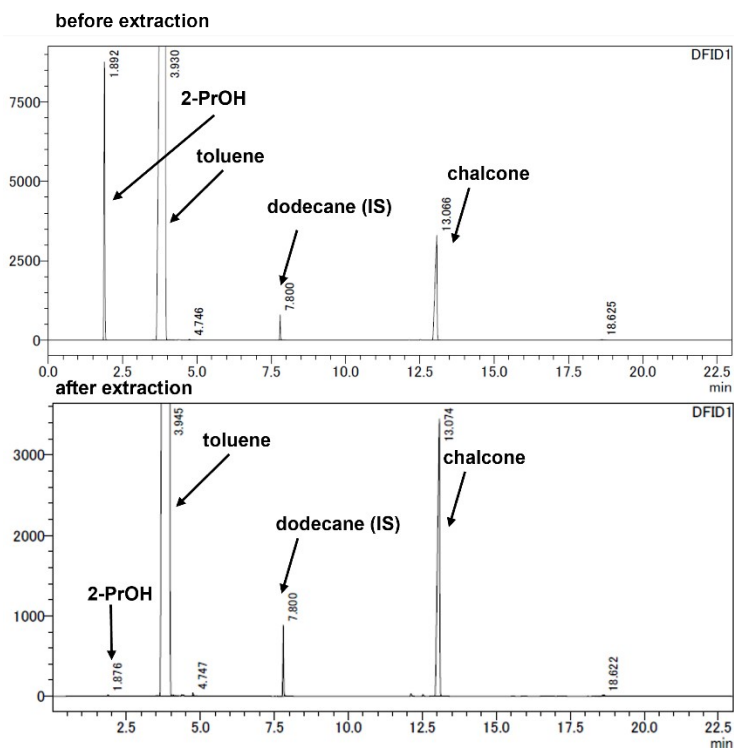

### 10%DMF (Table 4, entry 7)

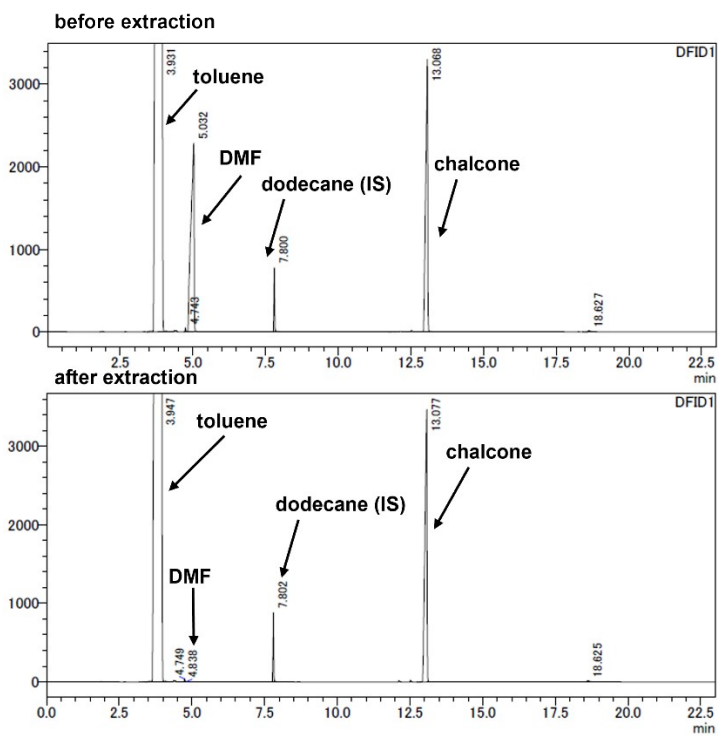

### 10%DMSO (Table 4, entry 8)

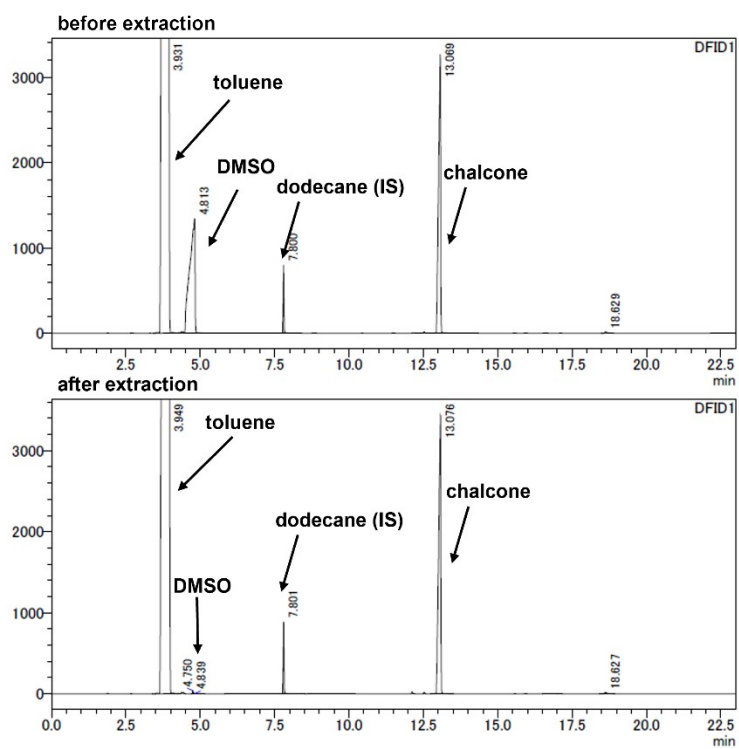

Supplement: d4re00276h1.pdf [file d4re00276h1.pdf]
